# Supplementary material
Source: PubMed Central journal article supplement (PMC6429636)
Supplement: DC181970SupplementaryData.pdf [file DC181970SupplementaryData.pdf]

SUPPLEMENTARY DATA

**Supplementary Table S1.** Metformin treatment effects on diabetes defined by fasting or 2-hour post-load glucose or HbA1c among parous women in subgroup combinations defined by gestational diabetes mellitus (GDM) and fasting glucose (FPG).

| FPG and GDM subgroups in parous women | N   | %    | Placebo Rate (cases/100pyr) | Metformin Rate (cases/100pyr) | Hazard Ratio MET vs PLAC (95% CI) | Subgroup by metformin p-value | Rate Difference (95% CI, cases/100pyr) | Subgroup by metformin p-value |
|---------------------------------------|-----|------|-----------------------------|-------------------------------|-----------------------------------|-------------------------------|----------------------------------------|-------------------------------|
| <b>Diabetes defined by glucose</b>    |     |      |                             |                               |                                   |                               |                                        |                               |
| <b>FPG (mg/dl) &amp; GDM</b>          |     |      |                             |                               |                                   | 0.04                          |                                        | 0.008                         |
| No GDM, FPG<110                       | 690 | 58.3 | 4.69                        | 4.54                          | 0.97 (0.77, 1.22)                 |                               | -0.15 (-1.20, 0.90)                    |                               |
| No GDM, FPG≥110                       | 261 | 22.1 | 14.59                       | 10.95                         | 0.75 (0.57, 1.00)                 |                               | -3.65 (-7.32, 0.02)                    |                               |
| GDM, FPG<110                          | 153 | 12.9 | 8.46                        | 5.06                          | 0.60 (0.39, 0.93)                 |                               | -3.40 (-6.31, -0.48)                   |                               |
| GDM, FPG≥110                          | 79  | 6.7  | 20.51                       | 10.4                          | 0.48 (0.29, 0.81)                 |                               | -10.13 (-18.24, -2.01)                 |                               |
| <b>GDM &amp; Age (years) *</b>        |     |      |                             |                               |                                   | 0.04                          |                                        | 0.01                          |
| No GDM, Age < 45                      | 227 | 19.3 | 7.18                        | 6.0                           | 0.83 (0.58, 1.20)                 |                               | -1.22 (-3.61, 1.18)                    |                               |
| No GDM, Age 45-59                     | 552 | 46.9 | 6.6                         | 5.6                           | 0.86 (0.68, 1.08)                 |                               | -0.98 (-2.40, 0.43)                    |                               |
| No GDM, Age≥ 60                       | 172 | 14.6 | 4.5                         | 7.0                           | 1.50 (0.97, 2.32)                 |                               | 2.50 (0.00, 5.00)                      |                               |
| GDM, Age < 45                         | 140 | 11.9 | 11.5                        | 7.4                           | 0.66 (0.43, 1.00)                 |                               | -4.13 (-8.16, -0.10)                   |                               |
| GDM, Age 45-59                        | 87  | 7.4  | 10.4                        | 5.6                           | 0.56 (0.32, 1.00)                 |                               | -4.80 (-9.10, -0.49)                   |                               |
| <b>Diabetes defined by HbA1c</b>      |     |      |                             |                               |                                   |                               |                                        |                               |
| <b>FPG (mg/dl) &amp; GDM</b>          |     |      |                             |                               |                                   | 0.55                          |                                        | 0.33                          |
| No GDM, FPG<110                       | 628 | 61.8 | 3.23                        | 2.10                          | 0.65 (0.48, 0.89)                 |                               | -1.14 (-1.93, -0.35)                   |                               |
| No GDM, FPG≥110                       | 190 | 18.7 | 8.35                        | 6.45                          | 0.78 (0.53, 1.14)                 |                               | -1.89 (-4.75, 0.96)                    |                               |
| GDM, FPG<110                          | 143 | 14.1 | 4.02                        | 2.01                          | 0.51 (0.27, 0.95)                 |                               | -2.01 (-3.82, -0.21)                   |                               |
| GDM, FPG≥110                          | 56  | 5.5  | 12.43                       | 6.09                          | 0.49 (0.25, 0.97)                 |                               | -6.34 (-12.54, -0.14)                  |                               |
| <b>GDM &amp; Age (years) *</b>        |     |      |                             |                               |                                   | 0.59                          |                                        | 0.47                          |
| No GDM, Age < 45                      | 201 | 19.9 | 4.44                        | 3.33                          | 0.75 (0.47, 1.19)                 |                               | -1.11 (-2.90, 0.69)                    |                               |
| No GDM, Age 45-5y                     | 473 | 46.7 | 4.17                        | 2.94                          | 0.71 (0.52, 0.97)                 |                               | -1.23 (-2.32, -0.15)                   |                               |
| No GDM, Age≥ 60                       | 144 | 14.2 | 3.34                        | 2.37                          | 0.77 (0.41, 1.42)                 |                               | -0.97 (-2.70, 0.76)                    |                               |
| GDM, Age < 45                         | 119 | 11.8 | 6.80                        | 3.04                          | 0.45 (0.25, 0.80)                 |                               | -3.77 (-6.58, -0.96)                   |                               |
| GDM, Age 45-59                        | 75  | 7.4  | 4.48                        | 2.26                          | 0.51 (0.22, 1.17)                 |                               | -2.22 (-4.77, 0.33)                    |                               |

\* Since there are no participants in the placebo group with GDM and Age>60+y groups, the combination was excluded in this analysis.

SUPPLEMENTARY DATA

**Supplementary Table S2.** Metformin treatment effects on diabetes defined by fasting or 2-hour post-load glucose or HbA1c among all participants in subgroup combinations defined by baseline age and fasting glucose (FPG).

| FPG and age subgroups in all participants | N   | %    | Placebo Rate (cases/100pyr) | Metformin Rate (cases/100pyr) | Hazard Ratio MET vs PLAC (95% CI) | Subgroup by metformin p-value | Rate Difference (95% CI, cases/100pyr) | Subgroup by metformin p-value |
|-------------------------------------------|-----|------|-----------------------------|-------------------------------|-----------------------------------|-------------------------------|----------------------------------------|-------------------------------|
| <b>Diabetes defined by glucose</b>        |     |      |                             |                               |                                   |                               |                                        |                               |
| Age (years) and FPG (mg/dl)               |     |      |                             |                               |                                   | 0.63                          |                                        | 0.61                          |
| Age < 45, FPG < 110                       | 441 | 20.5 | 4.34                        | 3.05                          | 0.70 (0.51, 0.97)                 |                               | -1.30 (-2.48, -0.11)                   |                               |
| Age < 45, FPG ≥ 110                       | 201 | 9.3  | 13.32                       | 10.17                         | 0.80 (0.57, 1.13)                 |                               | -3.15 (-7.15, 0.84)                    |                               |
| Age 45-59, FPG < 110                      | 727 | 33.7 | 4.23                        | 2.65                          | 0.64 (0.50, 0.83)                 |                               | -1.58 (-2.44, -0.73)                   |                               |
| Age 45-59, FPG ≥ 110                      | 371 | 17.2 | 11.15                       | 7.60                          | 0.71 (0.55, 0.92)                 |                               | -3.55 (-5.97, -1.14)                   |                               |
| Age ≥60, FPG ≤ 110                        | 272 | 12.6 | 4.53                        | 2.37                          | 0.56 (0.37, 0.87)                 |                               | -2.16 (-3.61, -0.71)                   |                               |
| Age ≥60, FPG ≥ 110                        | 143 | 6.6  | 10.20                       | 8.38                          | 0.90 (0.59, 1.37)                 |                               | -1.83 (-5.78, 2.12)                    |                               |
| <b>Diabetes defined by HbA1c</b>          |     |      |                             |                               |                                   |                               |                                        |                               |
| Age (years) and FPG (mg/dl)               |     |      |                             |                               |                                   | 0.74                          |                                        | 0.49                          |
| Age < 45, FPG < 110                       | 418 | 22.8 | 3.85                        | 2.77                          | 0.72 (0.51, 1.01)                 |                               | -1.08 (-2.21, 0.06)                    |                               |
| Age < 45, FPG ≥ 110                       | 144 | 7.9  | 9.96                        | 6.43                          | 0.65 (0.42, 1.02)                 |                               | -3.53 (-7.08, 0.02)                    |                               |
| Age 45-59, FPG < 110                      | 665 | 36.3 | 3.28                        | 2.06                          | 0.63 (0.47, 0.85)                 |                               | -1.22 (-1.98, -0.46)                   |                               |
| Age 45-59, FPG ≥ 110                      | 269 | 14.7 | 7.22                        | 4.59                          | 0.66 (0.47, 0.92)                 |                               | -2.63 (-4.64, -0.62)                   |                               |
| Age ≥60, FPG ≤ 110                        | 241 | 13.1 | 3.56                        | 1.47                          | 0.44 (0.26, 0.75)                 |                               | -2.09 (-3.35, -0.84)                   |                               |
| Age ≥60, FPG ≥ 110                        | 96  | 5.2  | 6.22                        | 4.30                          | 0.73 (0.40, 1.33)                 |                               | -1.91 (-5.05, 1.22)                    |                               |

SUPPLEMENTARY DATA

Supplementary Figure S1. Cumulative exposure to metformin by DPP treatment group

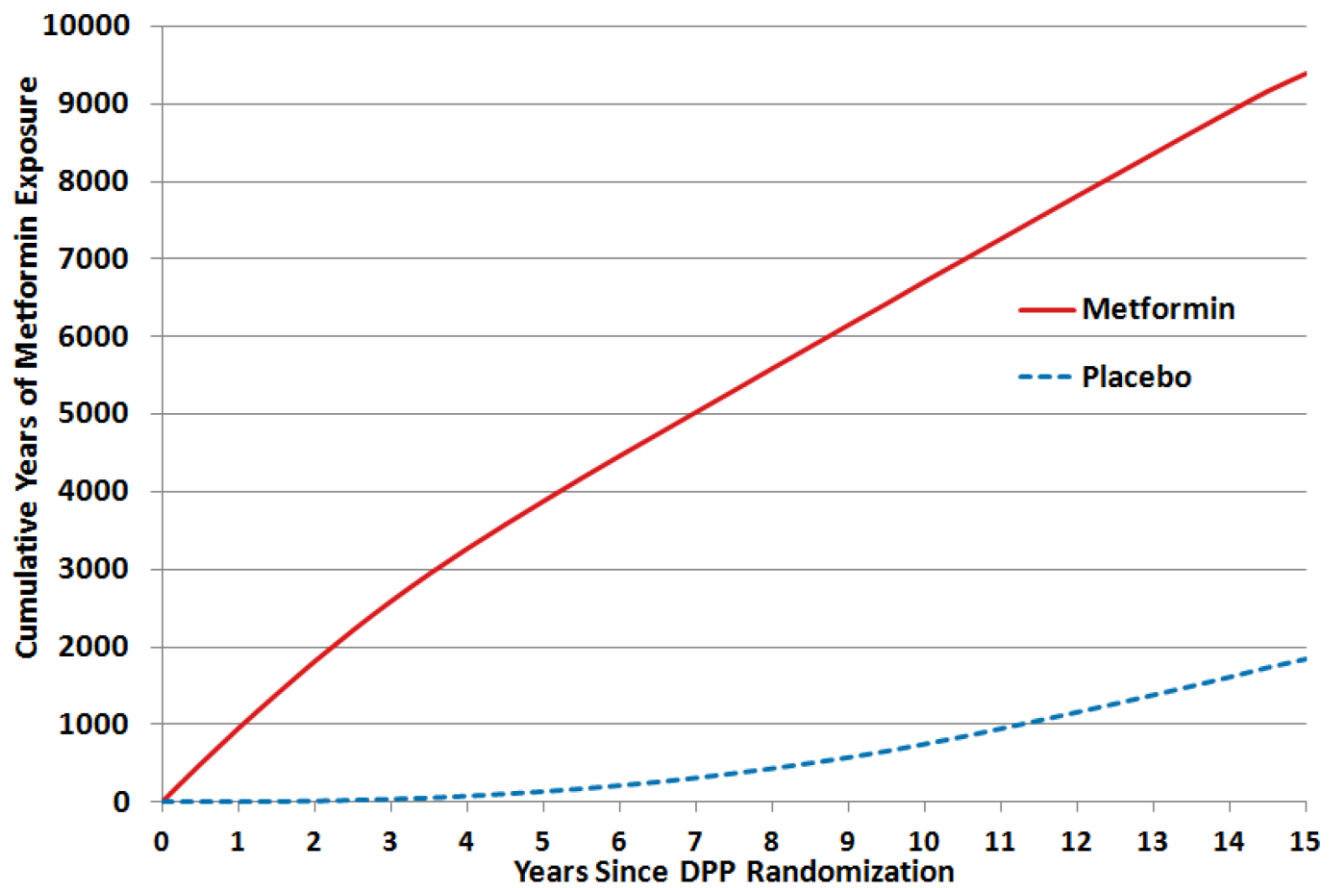

SUPPLEMENTARY DATA

**Pennington Biomedical Research Center  
(Baton Rouge, LA)**

George A. Bray, MD\*

Kishore Gadde, MD\*

Annie Chatellier, RN, CCRC\*\*

Jennifer Arceneaux RN, BSN\*\*

Amber Dragg RD, LDN\*\*

Crystal Duncan, LPN

Frank L. Greenway, MD

Daniel Hsia, MD

Erma Levy, RD

Monica Lockett, LPN

Donna H. Ryan, MD

**University of Chicago (Chicago, IL)**

David Ehrmann, MD\*

Margaret J. Matulik, RN, BSN\*\*

Kirsten Czech, MS

Catherine DeSandre, BA

**Jefferson Medical College (Philadelphia, PA)**

Barry J. Goldstein, MD, PhD\*

Kevin Furlong, DO\*

Kellie A. Smith, RN, MSN\*\*

Wendi Wildman, RN\*\*

Constance Pepe, MS, RD

**University of Miami (Miami, FL)**

Ronald B. Goldberg, MD\*

Jeanette Calles, MSEd\*\*

Juliet Ojito, RN\*\*

Sumaya Castillo-Florez, MPH

Hermes J. Florez, MD, PhD

Anna Giannella, RD, MS

Olga Lara

Beth Veciana

**The University of Texas Health Science Center  
(San Antonio, TX)**

Steven M. Haffner, MD, MPH\*

Helen P. Hazuda, PhD\*

Maria G. Montez, RN, MSHP, CDE\*\*

Kathy Hattaway, RD, MS

Carlos Lorenzo, MD, PhD

Arlene Martinez, RN, BSN, CDE

Tatiana Walker, RD, MS, CDE

**University of Colorado (Denver, CO)**

Richard F. Hamman, MD, DrPH\*

Dana Dabelea, MD, PhD\*

Lisa Testaverde, MS\*\*

Denise Anderson, RN, BSN

Alexis Bouffard, MA, RN, BSN

Tonya Jenkins, RD, CDE

Dione Lenz, RN, BSN, CDE

Leigh Perreault, MD

David W. Price, MD

Sheila C. Steinke, MS

**Joslin Diabetes Center (Boston, MA)**

Edward S. Horton, MD\*

Catherine S. Poirier, RN, BSN\*\*

Kati Swift, RN, BSN\*\*

SUPPLEMENTARY DATA

Enrique Caballero, MD

Barbara Fagnoli, RD

Ashley Guidi, BS

Mathew Guido, BA

Sharon D. Jackson, MS, RD, CDE

Lori Lambert, MS, RD, LD

Kathleen E. Lawton, RN

Sarah Ledbury, Med, RD

Jessica Sansoucy, BS

Jeanne Spellman, RD

**VA Puget Sound Health Care System and  
University of Washington (Seattle, WA)**

Steven E. Kahn, MB, ChB\*

Brenda K. Montgomery, RN, BSN, CDE\*\*

Wilfred Fujimoto, MD

Robert H. Knopp, MD

Edward W. Lipkin, MD

Ivy Morgan-Taggart

Anne Murillo, BS

Lonnese Taylor, RN, BS

April Thomas, RD, MPH, CDE

Elaine C. Tsai, MD, MPH

Dace Trence, MD

**University of Tennessee (Memphis, TN)**

Abbas E. Kitabchi, PhD, MD, FACP\*

Samuel Dagogo-Jack, MD\*

Mary E. Murphy, RN, MS, CDE, MBA\*\*

Laura Taylor, RN, BSN, CDE\*\*

Jennifer Dolgoff, RN, BSN\*\*

Debra Clark, LPN

Uzoma Ibebuogu, MD

Helen Lambeth, RN, BSN

Harriet Ricks

Lily M.K. Rutledge, RN, BSN

Judith E. Soberman, MD

**Northwestern University's Feinberg School of  
Medicine (Chicago, IL)**

Mark E. Molitch, MD\*

Boyd E. Metzger, MD\*

Mariana K. Johnson, MS, RN\*\*

Mimi M. Giles, MS, RD

Diane Larsen, BS

Samsam C. Pen, BA

**Massachusetts General Hospital (Boston, MA)**

David M. Nathan, MD\*

Mary Larkin, MSN\*

Charles McKittrick, BSN\*\*

Heather Turgeon, BSN\*\*

Ellen Anderson, MS, RD

Laurie Bissett, MS, RD

Kristy Bondi, BS

Enrico Cagliero, MD

Kali D'Anna

Linda Delahanty, MS, RD

Jose C. Florez, MD, PhD

Valerie Goldman, MS, RD

Peter Lou, MD

Alexandra Poulos

SUPPLEMENTARY DATA

Elyse Raymond, BS

Christine, Stevens

Beverly Tseng

**University of California-San Diego (San Diego, CA)**

Elizabeth Barrett-Connor, MD\*

Mary Lou Carrion-Petersen, RN, BSN\*\*

Lauren N. Claravall, BS

Jonalle M. Dowden, BS

Javiva Horne, RD

Diana Leos, RN, BSN

Sundar Mudaliar, MD

Jean Smith, RN

Simona Szerdi Janisch, BS

Karen Vejvoda, RN, BSN, CDE, CCRC

**Columbia University (New York, NY)**

F. Xavier Pi-Sunyer, MD\*

Jane E. Lee, MS\*\*

Sandra T. Foo, MD

Susan Hagamen, MS, RN, CDE

**Indiana University (Indianapolis, IN)**

David G. Marrero, PhD\*

Kieren J. Mather, MD\*

Susie M. Kelly, RN, CDE\*\*

Paula Putenney, RN\*\*

Marcia A. Jackson\*\*

Gina McAtee\*\*

Ronald T. Ackermann, MD

Carolyn M. Cantrell

Edwin S. Fineberg, MD

Angela Hadden (deceased)

Mario S. Kirkman

Erin O'Kelly Phillips

Paris J. Roach, MD

**Medstar Health Research Institute (Washington, DC)**

Robert E. Ratner, MD\*

Vanita Aroda, MD\*

Sue Shapiro, RN, BSN, CCRC\*\*

Catherine Bavidio-Arrage, MS, RD, LD

Peggy Gibbs

Gabriel Uwaifo, MD

Renee Wiggins, RD

**University of Southern California/UCLA Research Center (Alhambra, CA)**

Mohammed F. Saad, MD\*

Karol Watson, MD\*

Medhat Botrous, MD\*\*

Sujata Jinagouda, MD\*\*

Maria Budget

Claudia Conzues

Perpetua Magpuri

Kathy Ngo

Kathy Xaphthalmous

**Washington University (St. Louis, MO)**

Neil H. White, MD, CDE\*

Angela L. Brown, MD\*

Samia Das, MS, MBA, RD, LD\*\*

Prajakta Khare-Ranade, MSc, RDN, LD\*\*

SUPPLEMENTARY DATA

Tamara Stich, RN, MSN, CDE\*\*

Ana Santiago, RN

Cormarie Wernimont, RD, LD

**Johns Hopkins School of Medicine (Baltimore, MD)**

Christopher D. Saudek, MD\* (deceased)

Sherita Hill Golden, MD, MHS, FAHA\*

Tracy Whittington, BS\*\*

Frederick L. Brancati, MD, MHS (deceased)

Jeanne M. Clark, MD

Alicia Greene

Dawn Jiggetts

Henry Mosley

John Reusing

Richard R. Rubin, PhD (deceased)

Shawne Stephens

Evonne Utsey

**University of New Mexico (Albuquerque, NM)**

David S. Schade, MD\*

Karwyn S. Adams, RN, MSN\*\*

Claire Hemphill, RN, BSN\*\*

Penny Hyde, RN, BSN\*\*

Janene L. Canady, RN, CDE\*\*

Kathleen Colleran, MD

Ysela Gonzales, RN, MSN

Doris A. Hernandez-McGinnis

Carolyn King

**Albert Einstein College of Medicine (Bronx, NY)**

Jill Crandall, MD\*

Janet O. Brown, RN, MPH, MSN\*\*

Gilda Trandafirescu, MD\*\*

Elsie Adorno, BS

Helena Duffy, MS, C-ANP

Angela Goldstein, FNP-C, NPP, CSW

Jennifer Lukin, BA

Helen Martinez, RN, MSN, FNP-C

Dorothy Pompei, BA

Harry Shamoon, MD

Jonathan Scheindlin, MD

Elizabeth A. Walker, RN, DNSc, CDE

Judith Wylie-Rosett, EdD, RD

**University of Pittsburgh (Pittsburgh, PA)**

Trevor Orchard, MD\*

Andrea Kriska, PhD\*

Susan Jeffries, RN, MSN\*\*

M. Kaye Kramer, BSN, MPH\*\*

Marie Smith, RN, BSN\*\*

Catherine Benchoff

Stephanie Guimond, BS

Jessica Pettigrew, CMA

Debra Rubinstein, MD

Linda Semler, MS, RD

Elizabeth Venditti, PhD

Valarie Weinzierl, MPH

**University of Hawaii (Honolulu, HI)**

Richard F. Arakaki, MD\*

Narleen K. Baker-Ladao, BS\*\*

Mae K. Isonaga, RD, MPH\*\*

SUPPLEMENTARY DATA

Nina E. Bermudez, MS

Marjorie K. Mau, MD

John S. Melish, MD

Robin E. Yamamoto, CDE, RD

**Southwest American Indian Centers (Phoenix, AZ; Shiprock, NM; Zuni, NM)**

William C. Knowler, MD, DrPH\*

Norman Coeoyate\*\*

Alvera Enote\*\*

Mary A. Hoskin, RD, MS\*\*

Camille Natewa\*\*

Carol A. Percy, RN, MS\*\*

Kelly J. Acton, MD, MPH

Vickie L. Andre, RN, FNP

Roz Barber

Shandiin Begay, MPH

Brian C. Bucca, OD, FAAO

Sherron Cook

Jeff Curtis, MD

Charlotte Dodge

Matthew S. Doughty, MD

Jason Kurland, MD

Justin Glass, MD

Martia Glass, MD

Robert L. Hanson, MD, MPH

Louise E. Ingraham, MS, RD, LN

Kathleen M. Kobus, RNC-ANP

Jonathan Krakoff, MD

Catherine Manus, LPN

Cherie McCabe

Sara Michaels, MD

Tina Morgan

Julie A. Nelson, RD

Christopher Piromalli, DO

Robert J. Roy

Sandra Sangster, RD

Miranda Smart

Darryl P. Tonemah, PhD

Rachel Williams, FNP

Charlton Wilson, MD

**George Washington University Biostatistics Center (DPP Coordinating Center, Rockville, MD)**

Sarah Fowler, PhD\*

Marinella Temprosa, PhD\*

Michael Larsen, PhD\*

Tina Brenneman\*\*

Hanna Sherif, MS\*\*

Sharon L. Edelstein, ScM\*\*

Solome Abebe, MS

Julie Bamdad, MS

Melanie Barkalow

Joel Bethepu

Tsedenia Bezabeh

Nicole Butler

Jackie Callaghan

Caitlin E. Carter

Costas Christophi, PhD

Gregory M. Dwyer



SUPPLEMENTARY DATA

Mary Foulkes, PhD

Yuping Gao

Robert Gooding

Adrienne Gottlieb

Nisha Grover

Heather Hoffman, PhD

Ashley Hogan Tjaden, MPH

Kathleen Jablonski, PhD

Richard Katz, MD

Preethy Kolinjivadi, MS

John M. Lachin, ScD

Yong Ma, PhD

Qing Pan, PhD

Susan Reamer

Alla Sapozhnikova

**Lifestyle Resource Core**

Elizabeth M. Venditti, PhD\*

Andrea M. Kriska, PhD

Linda Semler, MS, RD, LDN

Valerie Weinzierl, MPH

**Central Biochemistry Laboratory (Seattle, WA)**

Santica Marcovina, PhD, ScD\*

Greg Stylewicz, PhD\*\*

John Albers, PhD

**NIH/NIDDK (Bethesda, MD)**

Judith Fradkin, MD

Sanford Garfield, PhD

Christine Lee, MD, MS

**Centers for Disease Control & Prevention  
(Atlanta, GA)**

Edward Gregg, PhD

Ping Zhang, PhD

**University of Michigan (Ann Arbor, MI)**

William H. Herman, MD, MPH

Michael Brändle, MD, MS

Morton B. Brown, PhD
